# Supplementary material
Source: Springer Nature journal article supplement (https://www.springermedizin.de/resource/supplementary/12889_2012_4838_MOESM1_ESM.pdf/9490774)
Supplement: MOESM1 [file 9490774]

### Parent & Teacher Community

- Participate in needs assessment
- Pretest instruments
- Review informed consent
- Participate in intervention trials
- Provide qualitative feedback on instruments and intervention

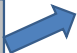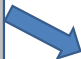

### Community NGO team

- Recruit participants
- Screen participants
- Serve as interventionists
- Conduct assessments
- Lead retention efforts
- Participate in instrument development
- Jointly develop intervention

### Academic team

- Lead study design
- Ensure scientific rigor
- Suggest theoretical framework
- Jointly develop intervention
- Develop assessments
- Conduct post-intervention analysis
